# Supplementary material for: Canagliflozin, a sodium glucose co-transporter 2 inhibitor, improves model-based indices of beta cell function in patients with type 2 diabetes
Source: PubMed Central journal article supplement (PMC3980039; doi:10.1007/s00125-014-3196-x), 2014-03-01
Supplement: 125_2014_3196_MOESM1_ESM.pdf [file 125_2014_3196_MOESM1_ESM.pdf]

**ESM Table 1. Fasting and Postprandial Glucose Concentrations in Study 3<sup>a</sup>**

|                                    | <b>SITA 100</b> | <b>CANA 300</b>      |
|------------------------------------|-----------------|----------------------|
|                                    | <b>(n = 61)</b> | <b>(n = 74)</b>      |
| <b>FPG, mmol/l</b>                 |                 |                      |
| Baseline                           | 8.6 (2.6)       | 8.5 (1.9)            |
| Week 52                            | 8.0 (2.0)       | 6.9 (1.6)            |
| Change from baseline               | -0.57 (2.64)    | -1.64 (2.05)         |
| $\Delta$ LSM (95% CI) <sup>b</sup> | —               | -1.13 (-0.54; -1.72) |
| <i>p</i> value <sup>c</sup>        | —               | 0.0002               |
| <b>MPG<sub>0-3h</sub>, mmol/l</b>  |                 |                      |
| Baseline                           | 14.4 (3.0)      | 14.2 (2.8)           |
| Week 52                            | 12.6 (2.8)      | 11.1 (2.2)           |
| Change from baseline               | -1.80 (2.90)    | -3.13 (2.90)         |
| $\Delta$ LSM (95% CI) <sup>b</sup> | —               | -1.52 (-0.75; -2.30) |
| <i>p</i> value <sup>c</sup>        | —               | 0.0002               |
| <b>Maximum PG, mmol/l</b>          |                 |                      |
| Baseline                           | 17.4 (3.4)      | 17.2 (3.6)           |
| Week 52                            | 15.4 (3.4)      | 13.7 (3.0)           |
| Change from baseline               | -2.0 (3.3)      | -3.5 (3.7)           |
| $\Delta$ LSM (95% CI) <sup>b</sup> | —               | -1.71 (-2.69; -0.74) |
| <i>p</i> value <sup>c</sup>        | —               | 0.0007               |

CANA 300, canagliflozin 300 mg; SITA 100, sitagliptin 100 mg.

<sup>a</sup>Data are mean (SD) unless otherwise indicated.

<sup>b</sup> $\Delta$ LSM is the SITA-subtracted LSM change from baseline.

<sup>c</sup>*p* value vs SITA at Week 52.
